# Supplementary material
Source: PubMed Central journal article supplement (PMC2804830)
Supplement: supp_108.072843_78345SinhaHikimcorrection.pdf [file supp_108.072843_78345SinhaHikimcorrection.pdf]

**ADDITIONS AND CORRECTIONS**

*Correction*

DOI: 10.1095/biolreprod.109.078345

Yue Jia, Jesse Castellanos, Christina Wang, Indrani Sinha-Hikim, Yanhe Lue, Ronald S. Swerdloff, and Amiya P. Sinha-Hikim. Mitogen-Activated Protein Kinase Signaling in Male Germ Cell Apoptosis in the Rat. Biol Reprod 2009; 80:771–780. DOI: 10.1095/biolreprod.108.072843

The manuscript referenced above inadvertently presented the incorrect e-mail address in the correspondence footnote. The correct e-mail address and complete correspondence footnote appears below.

<sup>2</sup>Correspondence: Amiya P. Sinha-Hikim, Division of Endocrinology, Department of Medicine, Harbor-UCLA Medical Center and Los Angeles Biomedical Research Institute, Box 446, 1000 West Carson Street, Torrance, CA 90509. FAX: 310 533 0627; e-mail: hikim@labiomed.org
